# Supplementary material for: SUCNR1 is Expressed in Human Placenta and Mediates Angiogenesis: Significance in Gestational Diabetes
Source: Preprints.org preprint supplement (doi:10.20944/preprints202110.0291.v1), 2021-10-20
Supplement: Supplementary file 1 [file supplementary]

SUCNR1 is expressed in human placenta and mediates angiogenesis:  
Significance in gestational diabetes.

Supplementary material

| Antibody          | Company           | Cat #      |
|-------------------|-------------------|------------|
| SUCNR1 (WB)       | Novus Biologicals | NBP2-82350 |
| SUCNR1 (IF, Flow) | Novus Biologicals | NLS3476    |
| VEGF              | Abcam             | ab51745    |
| VE-Cad            | Santa Cruz        | sc-9989    |
| VWF               | Abcam             | ab6994     |
| $\beta$ -Actin    | Cell Signaling    | mAB3700    |
| P-ERK             | Cell signaling    | 4370S      |
| P-AKT             | Cell signaling    | 4060S      |

**Table S1. List of primary antibodies used in the study and their catalogue numbers**

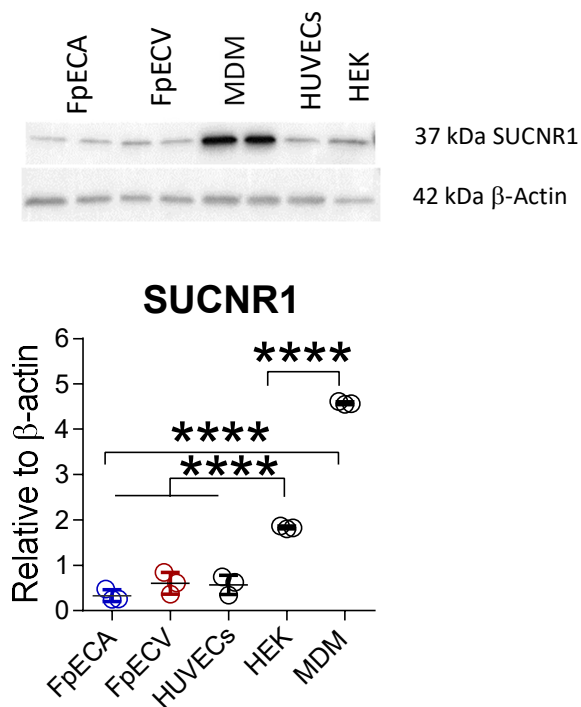

**Fig S1. HUVECs express similar SUCNR1 levels as FpECVs but comparatively lower levels than HEK cells and human MDMs.** Western blot of SUCNR1 and densitometric analysis in different cell models expressing the receptor analyzed by one-way ANOVA followed Tukey's post-hoc test, \*\*\*\*  $p < 0.0001$ , data are shown as mean  $\pm$  SD ( $n=3$ ). HEK cells (passage 16, originally from Jennifer Whistler lab (UCSF)) and monocyte-derived macrophages (MDMs) (isolated and differentiated from healthy donors) used for Western blot were accessible from another running study.

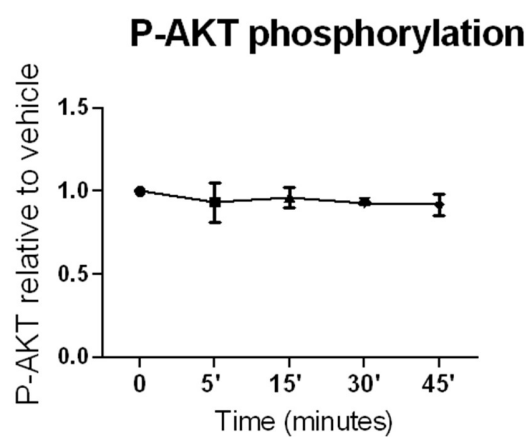

**Fig S2. Succinate fails to induce AKT phosphorylation in EA.hy926 cells.** Data are expressed as fold change in fluorescence intensity relative to vehicle. Data are shown as mean  $\pm$  SEM (n=3).
